# Supplementary material for: High-capacity cathodes for magnesium lithium chlorine tri-ion batteries through chloride intercalation in layered MoS2: a computational study
Source: Royal Society of Chemistry journal article supplement (doi:10.1039/c8ta01050a), 2018-01-01

## Supporting Information

### High-capacity cathodes for magnesium lithium chlorine tri-ion batteries through chloride intercalation in layered MoS<sub>2</sub>: a computational study

Zhuo Wang, and Guosheng Shao \*

**Table S1.** Voltages (v.s. Li) and capacities in the Li<sub>x</sub>MoS<sub>2</sub> system

| Compositions                        | Voltage v.s. Li (V) | Capacity (mAhg <sup>-1</sup> ) |
|-------------------------------------|---------------------|--------------------------------|
| Li <sub>0.25</sub> MoS <sub>2</sub> | 2.5                 | 41.4                           |
| Li <sub>0.5</sub> MoS <sub>2</sub>  | 1.54                | 82.0                           |
| Li <sub>0.75</sub> MoS <sub>2</sub> | 1.49                | 121.6                          |
| LiMoS <sub>2</sub>                  | 1.35                | 160.5                          |
| Li <sub>1.5</sub> MoS <sub>2</sub>  | 0.37                | -                              |

**Table S2.** Voltages (v.s. Mg) and capacities in the Mg<sub>x</sub>MoS<sub>2</sub> or hybrid Mg<sup>2+</sup>/Li<sup>+</sup> compounds with stable *dT* structures.

| Compositions                                           | Voltage v.s. Mg (V) | Capacity (mAhg <sup>-1</sup> ) |
|--------------------------------------------------------|---------------------|--------------------------------|
| Mg <sub>0.25</sub> MoS <sub>2</sub>                    | 0.65                | 80.7                           |
| Mg <sub>0.5</sub> MoS <sub>2</sub>                     | 0.18                | 155.8                          |
| Mg <sub>0.75</sub> MoS <sub>2</sub>                    | 0.06                | -                              |
| Li <sub>0.25</sub> Mg <sub>0.25</sub> MoS <sub>2</sub> | 1.08                | 119.8                          |
| Li <sub>0.5</sub> Mg <sub>0.25</sub> MoS <sub>2</sub>  | 0.9                 | 160.0                          |

**Table S3.** Voltage (v.s. Mg) and capacities in Li<sub>x</sub>Mg<sub>y</sub>MoS<sub>2</sub>Cl<sub>0.5</sub> compounds with stable *dT* structures.

| Compositions                                                             | Voltage v.s. Mg (V) | Capacity (mAhg <sup>-1</sup> ) |
|--------------------------------------------------------------------------|---------------------|--------------------------------|
| Li <sub>0.5</sub> MoS <sub>2</sub> Cl <sub>0.5</sub>                     | 2.4                 | 147.9                          |
| Mg <sub>0.25</sub> MoS <sub>2</sub> Cl <sub>0.5</sub>                    | 1.9                 | 145.9                          |
| Li <sub>0.25</sub> Mg <sub>0.25</sub> MoS <sub>2</sub> Cl <sub>0.5</sub> | 1.1                 | 180.6                          |
| Li <sub>0.5</sub> Mg <sub>0.25</sub> MoS <sub>2</sub> Cl <sub>0.5</sub>  | 0.92                | 214.7                          |
| LiMoS <sub>2</sub> Cl <sub>0.5</sub>                                     | 0.85                | 217.6                          |
| Mg <sub>0.5</sub> MoS <sub>2</sub> Cl <sub>0.5</sub>                     | 0.8                 | 211.9                          |
| Li <sub>0.25</sub> Mg <sub>0.5</sub> MoS <sub>2</sub> Cl <sub>0.5</sub>  | 0.75                | 244.9                          |
| Li <sub>0.5</sub> Mg <sub>0.5</sub> MoS <sub>2</sub> Cl <sub>0.5</sub>   | 0.67                | 277.4                          |

**Tables S4** Reported data on performance of different cathode materials.

| Material                                                  | Electrolyte (mol)                                              | Capacity (mAhg <sup>-1</sup> ) at 0.1C * | Voltage (V) | Morphology                                   |
|-----------------------------------------------------------|----------------------------------------------------------------|------------------------------------------|-------------|----------------------------------------------|
| Expanded MoS <sub>2</sub> /graphene                       | 0.25LiCl+0.25APC                                               | 300                                      | 1.2         | Nanosheets <sup>1</sup>                      |
| Expanded TiS <sub>2</sub>                                 | 0.2PY14Cl+0.25APC                                              | 239                                      | 0.7         | Nanosheets <sup>2</sup>                      |
| TiS <sub>2</sub>                                          | 0.1Mg(BH <sub>4</sub> ) <sub>2</sub> + 1.0NaBH <sub>4</sub>    | 200                                      | ~1.1        | Nanosheets <sup>3</sup>                      |
| MoS <sub>2</sub>                                          | 1LiCl+0.4APC                                                   | 243                                      | 1.1         | Nanoflakes <sup>4</sup>                      |
| TiO <sub>2</sub>                                          | 1.5LiBH <sub>4</sub> +0.5Mg(BH <sub>4</sub> ) <sub>2</sub> /TG | 140                                      | 1.15        | Nanoparticles <sup>5</sup>                   |
| Li <sub>4</sub> Ti <sub>5</sub> O <sub>12</sub> /Graphene | 1.5LiBH <sub>4</sub> +0.4APC                                   | 147.5                                    | ~1.1        | Micron-sized particles <sup>6</sup>          |
| Mo <sub>6</sub> S <sub>8</sub>                            | 0.4LiCl+1APC                                                   | 126                                      | ~1.7        | Particles <sup>7</sup>                       |
| Ti <sub>3</sub> C <sub>2</sub> T <sub>x</sub> /CNT        | 0.4LiCl+0.5APC                                                 | 105                                      | -           | Micron-sized delaminated flakes <sup>8</sup> |

\* Reported experimental data were based on active cathode (e.g. sulphide) materials in composite cathodes.

1.X. Fan, R. R. Gaddam, N. A. Kumar and X. S. Zhao, *Adv. Energy Mater.*, 2017, 1700317.

2. H. D. Yoo, Y. Liang, H. Dong, J. Lin, H. Wang, Y. Liu, L. Ma, T. Wu, Y. Li, Q. Ru, Y. Jing, Q. An, W. Zhou, J. Guo, J. Lu, S. T. Pantelides, X. Qian and Y. Yao, *Nat. Commun.*, 2017, **8**, 339.

3.X. Bian, Y. Gao, Q. Fu, S. Indris, Y. Ju, Y. Meng, F. Du, N. Bramnik, H. Ehrenberg and Y. Wei, *J. Mater. Chem. A*, 2017, **5**, 600-608.

4.Yanming Ju, Yuan Meng, Yingjin Wei, Xiaofei Bian, Qiang Pang, Yu Gao, Fei Du, Bingbing Liu and G. Chen, *Chem. Eur. J.*, 2016, **22**, 18073 – 18079.

5. S. Su, Z. Huang, Y. NuLi, F. Tuerxun, J. Yang and J. Wang, *Chem. Commun.*, 2015, **51**, 2641-2644.

6. Q. Miao, Y. NuLi, N. Wang, J. Yang, J. Wang and S.-i. Hirano, *RSC Advances*, 2016, **6**, 3231-3234.

7. Y. Cheng, Y. Shao, J. G. Zhang, V. L. Sprenkle, J. Liu and G. Li, *Chem. Commun.*, 2014, **50**, 9644--9646.

8. A. Byeon, M. Q. Zhao, C. E. Ren, J. Halim, S. Kota, P. Urbankowski, B. Anasori, M. W. Barsoum and Y. Gogotsi, *ACS Appl. Mater. Interfaces*, 2017, **9**, 4296-4300.

**Figure S1** Low energy structural configurations from USPEX global searching: (a) single layer MoS<sub>2</sub> (2H phase), (b) Li<sub>0.5</sub>MoS<sub>2</sub>, (c) LiMoS<sub>2</sub>, (d) Mg<sub>0.25</sub>MoS<sub>2</sub>, (e) Mg<sub>0.5</sub>MoS<sub>2</sub>, (f) Li<sub>0.5</sub>Mg<sub>0.25</sub>MoS<sub>2</sub>, and (g) Li<sub>0.25</sub>Mg<sub>0.5</sub>MoS<sub>2</sub>. (b-g) exhibit characteristic layered structure of dT phases.

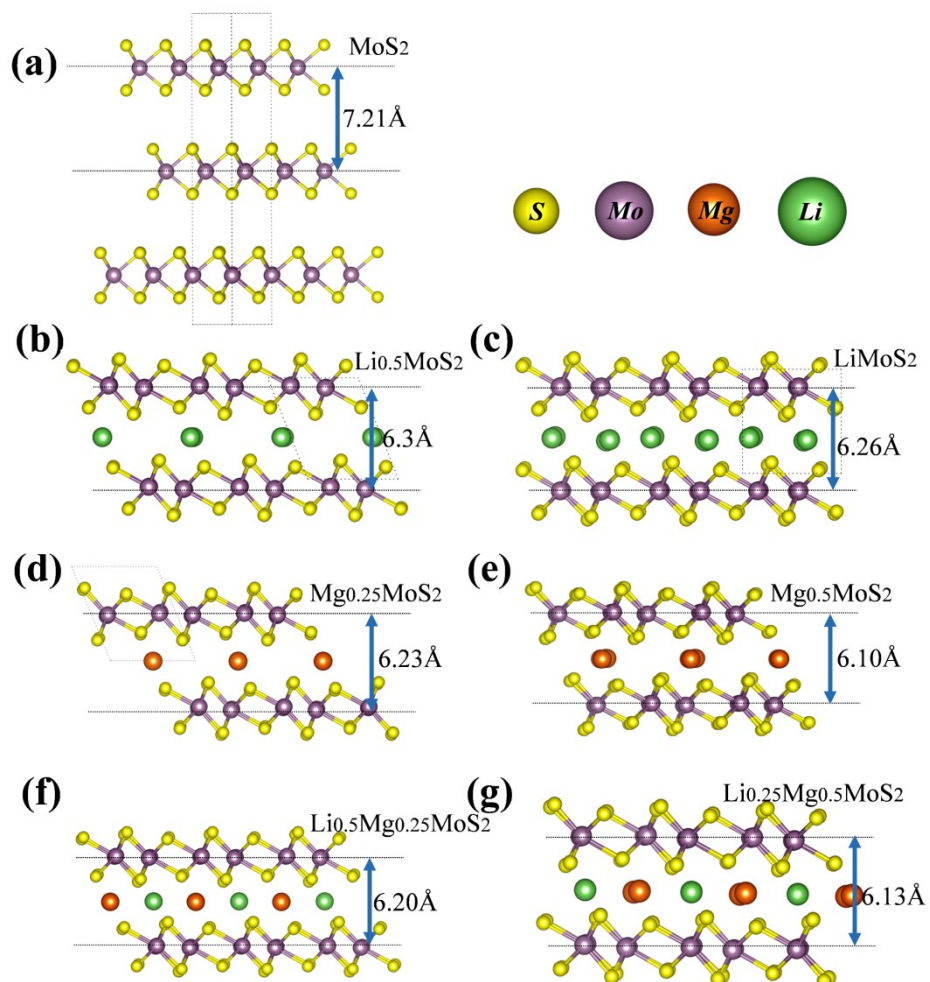

**Figure S2** Low-energy structural configurations from USPEX global searching, for (a)  $\text{Li}_{1.5}\text{MoS}_2$ , (b)  $\text{Li}_{0.5}\text{Mg}_{0.5}\text{MoS}_2$ , and (c)  $\text{Mg}_{0.75}\text{MoS}_2$ . Higher level of intercalation of alkali and/or alkali-earth metal ions leads to loss of layered structures.

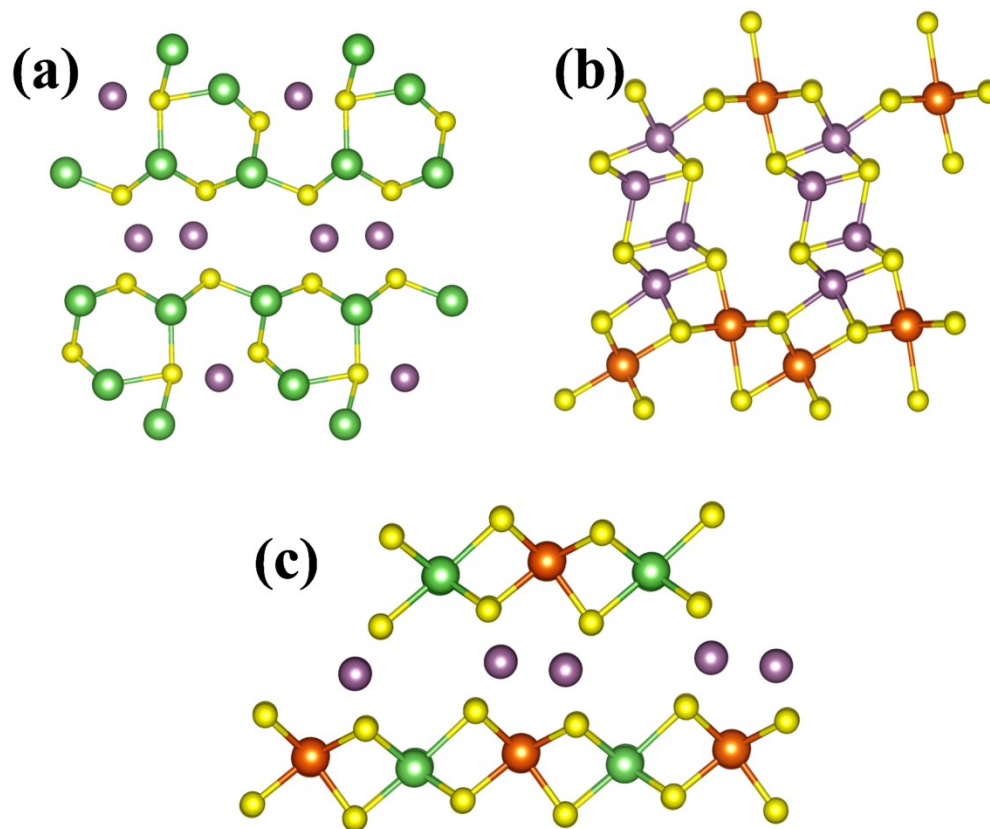

**Figure S3** Reference AIMD simulation for the well-established LIB cathode  $\text{LiCoO}_2$ : (a) Layered structure of  $\text{LiCoO}_2$ , (b)  $\text{Li}^+$  diffusion coefficient in  $\text{LiCoO}_2$ , and (c) trajectory map of  $\text{Li}^+$  ions from the particle density distribution at 1200K.

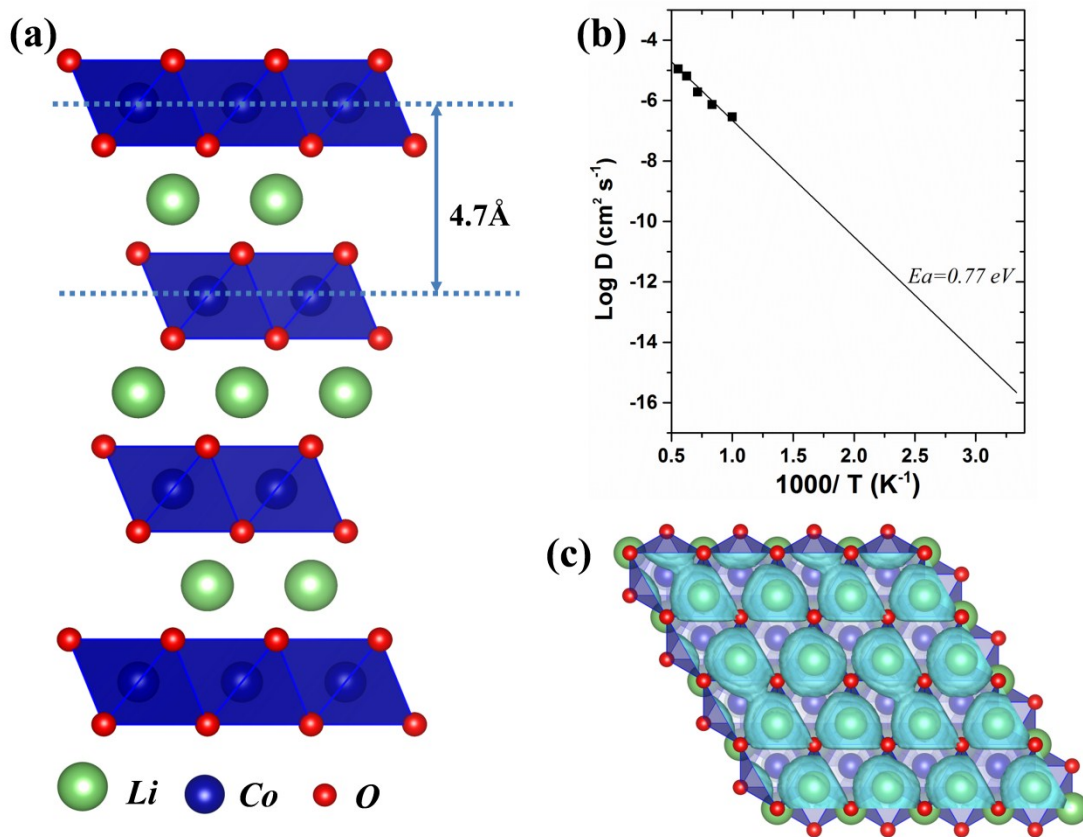

**Figure S4** The trajectory of ions from AIMD at 1200K from the particle density distribution: Trajectories of (a)  $\text{Cl}^-$  and (b)  $\text{Mg}^{2+}$  in  $\text{Mg}_{0.5}\text{MoS}_2\text{Cl}_{0.5}$ ; Trajectories of (c)  $\text{Cl}^-$ , (d)  $\text{Mg}^{2+}$ , and (e)  $\text{Li}^+$  in  $\text{Li}_{0.25}\text{Mg}_{0.25}\text{MoS}_2\text{Cl}_{0.5}$ .

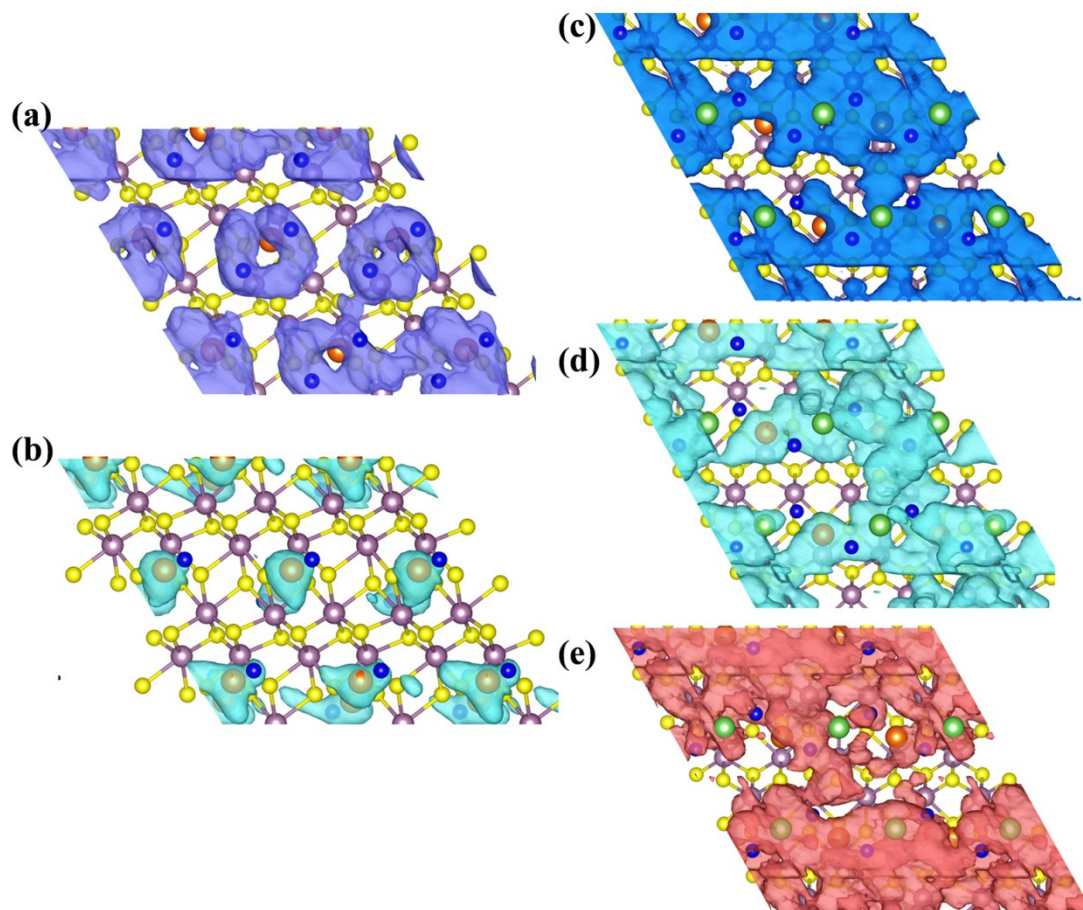

Supplement: c8ta01050a1.pdf [file c8ta01050a1.pdf]
